# Supplementary material for: Genetic Susceptibility in Head and Neck Squamous Cell Carcinoma in a Spanish Population
Source: PubMed Central journal article supplement (PMC6521206; doi:10.3390/cancers11040493), 2019-04-07
Supplement: cancers-11-00493-s001.pdf [file cancers-11-00493-s001.pdf]

## Supplementary Materials: Genetic susceptibility in head and neck squamous cell carcinoma in a Spanish population

Javier Fernández-Mateos, Raquel Seijas-Tamayo, Juan Carlos Adansa Klain, Miguel Pastor Borgoñón, Elisabeth Pérez-Ruiz, Ricard Mesía, Elvira del Barco, Carmen Salvador Coloma, Antonio Rueda Dominguez, Javier Caballero Daroqui, Encarnación Fernández Ruiz, Alberto Ocana, Rogelio González-Sarmiento and Juan Jesús Cruz-Hernández

**Table S1.** Primer sequences and genotyping assays in those SNPs defined in Table 5 without specific TaqMan® probes.

| SNP                           | Primer  | Primer Sequence (5'-3')                | Type of Assay                             |
|-------------------------------|---------|----------------------------------------|-------------------------------------------|
| <i>MDM2</i><br>rs2279744      | forward | 5'-CAGGTCTCCGCGGGAGTTC-3'              | Digestion with MspA1I                     |
|                               | reverse | 5'-CGTGTCTGAACTTGACCAGC-3'             |                                           |
| <i>KRAS-LC6</i><br>rs61764370 | forward | 5'-GCCAGGCTGGTCTCGAA-3'                | Custom probe<br>CTCAAGTGAT[T/G]CACC<br>AC |
|                               | reverse | 5'-CTGAATAAATGAGTTCTGCAAACAG<br>GTT-3' |                                           |
| <i>GSTT1</i>                  | forward | 5'-TTCCTTACTGGTCCTCACATCCTC-3'         | Null/present                              |
|                               | reverse | 5'-TCACCGGATCATGGCCAGCA-3'             |                                           |
| <i>GSTM1</i>                  | forward | 5'CGCCATCTTGTGCTACATTGCCCG-3'          | Null/present                              |
|                               | reverse | 5'-TTCTGGATTGTAGCAGATCA-3'             |                                           |
| <i>β-actin</i>                | forward | 5'-CCAACCGCGAGAAGATGA-3'               |                                           |
|                               | reverse | 5'-CCCGAGGCGTACAGGGATAG-3'             |                                           |

Table S2. Distribution between studied SNPs in different genes in laryngeal tumours (Ca) and controls (Co)\*.

| FUNCTION                             | GENE                     | RS         | Homozygotes<br>Common Alleles |     | Heterozygotes |    |              | Homozygotes Rarer Allele |    |    |              |                      |
|--------------------------------------|--------------------------|------------|-------------------------------|-----|---------------|----|--------------|--------------------------|----|----|--------------|----------------------|
|                                      |                          |            | Ca                            | Co  | Ca            | Co | p-value      | OR (95% CI)              | Ca | Co | p-Value      | OR (95% CI)          |
| Oncogenes/tumour<br>suppressor genes | <i>TP53</i>              | 1042522    | 61                            | 62  | 54            | 37 | 0.165        | 1.505 (0.846–2.677)      | 11 | 27 | <b>0.008</b> | 0.319 (0.136–0.745)  |
|                                      | <i>MDM2</i>              | 2279744    | 44                            | 65  | 57            | 53 | 0.279        | 1.364 (0.778–2.392)      | 25 | 11 | <b>0.015</b> | 2.826 (1.219–6.552)  |
|                                      | <i>KRAS-LC6</i>          | rs61764370 | 97                            | 87  | 27            | 33 | 0.382        | 0.762 (0.414–1.401)      | 2  | 6  | 0.247        | 0.367 (0.068–1.998)  |
|                                      | <i>EGFR</i>              | 2227983    | 78                            | 72  | 41            | 44 | 0.514        | 0.830 (0.474–1.453)      | 7  | 10 | 0.283        | 0.536 (0.197–1.608)  |
| Base excision repair (BER)           | <i>XRCC1</i>             | 25487      | 58                            | 57  | 50            | 55 | 0.794        | 0.929 (0.533–1.617)      | 18 | 14 | 0.724        | 1.160 (0.509–2.646)  |
|                                      |                          | 1799782    | 106                           | 109 | 20            | 14 | 0.371        | 1.416 (0.663–3.012)      | 0  | 2  | 0.999        | 0.000 (0.000–)       |
|                                      | <i>APEX</i>              | 1130409    | 38                            | 42  | 65            | 49 | 0.308        | 1.366 (0.750–2.490)      | 23 | 35 | 0.546        | 0.803 (0.394–1.637)  |
| Nucleotide excision<br>repair (NER)  | <i>ERCC2 (XPD)</i>       | 13181      | 72                            | 52  | 46            | 58 | 0.247        | 0.720 (0.413–1.255)      | 8  | 16 | <b>0.046</b> | 0.375 (0.143–0.982)  |
|                                      | <i>ERCC1</i>             | 11615      | 53                            | 45  | 67            | 58 | 0.872        | 0.956 (0.550–1.661)      | 6  | 23 | <b>0.013</b> | 0.281 (0.103–0.768)  |
|                                      | <i>XPC</i>               | 2228000    | 62                            | 61  | 57            | 52 | 0.530        | 1.190 (0.692–2.046)      | 7  | 13 | 0.384        | 0.636 (0.230–1.763)  |
| Double-strand break<br>repair genes  | <i>XRCC3</i>             | 861539     | 49                            | 47  | 59            | 58 | 0.721        | 0.902 (0.512–1.590)      | 18 | 21 | 0.504        | 0.766 (0.352–1.671)  |
|                                      |                          | 1799794    | 78                            | 78  | 43            | 40 | 0.593        | 1.166 (0.664–2.047)      | 5  | 8  | 0.789        | 0.849 (0.255–2.823)  |
|                                      | <i>KU70</i>              | 2267437    | 39                            | 44  | 65            | 58 | 0.995        | 0.998 (0.550–1.811)      | 22 | 24 | 0.780        | 0.898 (0.422–1.909)  |
| Inflammatory genes                   | <i>IL1B</i>              | 16944      | 56                            | 58  | 58            | 56 | 0.849        | 1.054 (0.612–1.817)      | 12 | 12 | 0.930        | 0.959 (0.382–2.408)  |
|                                      | <i>IL2</i>               | 2069762    | 62                            | 67  | 56            | 45 | 0.307        | 1.333 (0.768–2.311)      | 8  | 14 | 0.132        | 0.472 (0.178–1.253)  |
|                                      | <i>IL6</i>               | 1800795    | 43                            | 62  | 64            | 46 | <b>0.003</b> | 2.471 (1.372–4.452)      | 19 | 14 | 0.070        | 2.164 (0.938–4.991)  |
|                                      | <i>IL10</i>              | 1800872    | 75                            | 71  | 45            | 47 | 0.557        | 0.849 (0.491–1.467)      | 6  | 8  | 0.540        | 0.694 (0.216–2.229)  |
|                                      | <i>TNFA</i>              | 361525     | 104                           | 103 | 19            | 21 | 0.694        | 0.866 (0.422–1.777)      | 3  | 2  | 0.632        | 1.565 (0.250–9.780)  |
| Apoptotic genes                      | <i>NOD2</i>              | 2066844    | 110                           | 109 | 16            | 17 | 0.876        | 0.940 (0.433–2.043)      | 0  | 0  | -            | -                    |
|                                      |                          | 2066845    | 112                           | 119 | 4             | 7  | 0.277        | 0.485 (0.131–1.789)      | 0  | 0  | -            | -                    |
|                                      | <i>BAX</i>               | 4645878    | 92                            | 93  | 31            | 31 | 0.806        | 1.078 (0.592–1.964)      | 2  | 2  | 0.986        | 1.017 (0.146–7.065)  |
|                                      | <i>BCL2</i>              | 2279115    | 37                            | 40  | 66            | 55 | 0.124        | 1.614 (0.878–2.969)      | 23 | 31 | 0.896        | 1.050 (0.501–2.203)  |
| Carcinogen metabolism<br>genes       | <i>CYP3A5</i>            | rs776746   | 116                           | 110 | 8             | 14 | 0.246        | 0.573 (0.223–1.468)      | 1  | 1  | 0.914        | 1.167 (0.072–19.029) |
|                                      | <i>GSTP1</i>             | 1695       | 65                            | 62  | 54            | 51 | 0.805        | 1.071 (0.622–1.842)      | 12 | 6  | 0.254        | 0.535 (0.183–1.568)  |
|                                      | <i>GSTT1</i>             | N/A        | 110                           | 109 | 15            | 17 | 0.483        | 1.322 (0.606–2.882)      |    |    |              |                      |
|                                      | <i>GSTM1</i>             | N/A        | 66                            | 59  | 59            | 67 | 0.337        | 1.289 (0.767–2.168)      |    |    |              |                      |
|                                      | <i>NFE2L2<br/>(NRF2)</i> | 13035806   | 109                           | 95  | 14            | 29 | <b>0.019</b> | 0.424 (0.207–0.869)      | 2  | 1  | 0.520        | 2.235 (0.193–25.903) |
|                                      | <i>KEAP1</i>             | 2706110    | 92                            | 72  | 24            | 47 | <b>0.005</b> | 0.425 (0.233–0.775)      | 9  | 7  | 0.732        | 1.207(0.411–3.541)   |
|                                      |                          | 1048290    | 50                            | 53  | 58            | 57 | 0.768        | 1.008 (0.622–1.900)      | 17 | 16 | 0.541        | 1.290 (0.569–2.925)  |

\*p-values were adjusted by age and related to controls. Statistically significant results are in bold.

**Table S3.** Distribution between studied SNPs in different genes in tumours from oral cavity (Ca) and controls (Co).

| FUNCTION                          | GENE               | RS         | Homozygotes Common Alleles |    | Heterozygotes |    |                 |                     | Homozygotes Rarer Allele |    |                 |                      |
|-----------------------------------|--------------------|------------|----------------------------|----|---------------|----|-----------------|---------------------|--------------------------|----|-----------------|----------------------|
|                                   |                    |            | Ca                         | Co | Ca            | Co | <i>p</i> -value | OR (95% CI)         | Ca                       | Co | <i>p</i> -Value | OR (95% CI)          |
| Oncogenes/tumour suppressor genes | <i>TP53</i>        | 1042522    | 32                         | 38 | 30            | 21 | 0.156           | 1.696 (0.818–3.518) | 8                        | 11 | 0.779           | 0.864 (0.310–2.407)  |
|                                   | <i>MDM2</i>        | 2279744    | 30                         | 30 | 28            | 34 | 0.593           | 0.824 (0.404–1.678) | 12                       | 6  | 0.218           | 2.000 (0.664–6.026)  |
|                                   | <i>KRAS-LC6</i>    | rs61764370 | 40                         | 49 | 26            | 18 | 0.126           | 1.769 (0.851–3.678) | 4                        | 3  | 0.536           | 1.633 (0.345–7.727)  |
|                                   | <i>EGFR</i>        | 2227983    | 41                         | 35 | 25            | 30 | 0.338           | 0.711 (0.354–1.428) | 4                        | 5  | 0.591           | 0.683 (0.170–2.742)  |
| Base excision repair (BER)        | <i>XRCC1</i>       | 25487      | 31                         | 31 | 30            | 30 | 1.000           | 1.000 (0.492–2.034) | 9                        | 9  | 1.000           | 1.000 (0.350–2.856)  |
|                                   |                    | 1799782    | 62                         | 62 | 8             | 8  | 1.000           | 1.000 (0.353–2.833) | 0                        | 0  | -               | -                    |
| Nucleotide excision repair (NER)  | <i>APEX</i>        | 1130409    | 18                         | 25 | 39            | 26 | 0.066           | 2.083 (0.952–4.559) | 13                       | 19 | 0.914           | 0.950 (0.375–2.408)  |
|                                   | <i>ERCC2 (XPD)</i> | 13181      | 24                         | 33 | 36            | 27 | 0.101           | 1.833 (0.888–3.785) | 10                       | 10 | 0.541           | 1.371 (0.495–3.821)  |
|                                   | <i>ERCC1</i>       | 11615      | 19                         | 22 | 43            | 36 | 0.401           | 1.383 (0.649–2.948) | 8                        | 12 | 0.640           | 0.772 (0.261–2.284)  |
| Double-strand break repair genes  | <i>XPC</i>         | 2228000    | 36                         | 37 | 27            | 26 | 0.857           | 1.067 (0.526–2.165) | 7                        | 7  | 0.963           | 1.028 (0.327–3.226)  |
|                                   | <i>XRCC3</i>       | 861539     | 27                         | 32 | 29            | 28 | 0.582           | 1.228 (0.592–2.546) | 14                       | 10 | 0.301           | 1.659 (0.636–4.332)  |
|                                   |                    | 1799794    | 39                         | 42 | 26            | 23 | 0.587           | 1.217 (0.598–2.477) | 5                        | 5  | 0.912           | 1.077 (0.289–4.007)  |
|                                   | <i>KU70</i>        | 2267437    | 19                         | 22 | 35            | 34 | 0.657           | 1.192 (0.550–2.585) | 16                       | 14 | 0.561           | 1.323 (0.515–3.401)  |
| Inflammatory genes                | <i>IL1B</i>        | 16944      | 27                         | 37 | 36            | 27 | 0.093           | 1.827 (0.904–3.693) | 7                        | 6  | 0.443           | 1.599 (0.483–5.297)  |
|                                   | <i>IL2</i>         | 2069762    | 43                         | 31 | 22            | 27 | 0.152           | 0.587 (0.284–1.217) | 5                        | 12 | <b>0.039</b>    | 0.300 (0.096–0.940)  |
|                                   | <i>IL6</i>         | 1800795    | 25                         | 39 | 33            | 23 | <b>0.031</b>    | 2.238 (1.077–4.653) | 12                       | 8  | 0.104           | 2.340 (0.839–6.528)  |
|                                   | <i>IL10</i>        | 1800872    | 29                         | 37 | 37            | 29 | 0.165           | 1.628 (0.819–3.237) | 4                        | 4  | 0.745           | 1.276 (0.294–5.542)  |
|                                   | <i>TNFA</i>        | 361525     | 61                         | 60 | 8             | 9  | 0.796           | 0.874 (0.316–2.417) | 1                        | 1  | 0.991           | 0.984 (0.060–16.088) |
| Apoptotic genes                   | <i>NOD2</i>        | 2066844    | 62                         | 63 | 8             | 7  | 0.785           | 1.161 (0.397–3.397) | 0                        | 0  | -               | -                    |
|                                   |                    | 2066845    | 68                         | 67 | 2             | 3  | 0.651           | 0.657 (0.106–4.057) | 0                        | 0  | -               | -                    |
|                                   | <i>BAX</i>         | 4645878    | 51                         | 51 | 19            | 18 | 0.888           | 1.056 (0.497–2.240) | 0                        | 1  | 1.000           | 0.000 (0.000–)       |
|                                   | <i>BCL2</i>        | 2279115    | 13                         | 27 | 43            | 30 | <b>0.008</b>    | 2.977 (1.325–6.688) | 14                       | 13 | 0.116           | 2.237 (0.820–6.103)  |
| Carcinogen metabolism genes       | <i>CYP3A5</i>      | rs776746   | 61                         | 63 | 9             | 6  | 0.432           | 1.549 (0.520–4.614) | 0                        | 0  | -               | -                    |
|                                   | <i>GSTP1</i>       | 1695       | 38                         | 33 | 29            | 28 | 0.766           | 0.899 (0.448–1.808) | 3                        | 8  | 0.118           | 0.326 (0.080–1.329)  |
|                                   | <i>GSTT1</i>       | N/A        | 8                          | 11 | 62            | 59 | 0.461           | 1.445 (0.543–3.842) |                          |    |                 |                      |
|                                   | <i>GSTM1</i>       | N/A        | 42                         | 34 | 28            | 36 | 0.176           | 0.630 (0.322–1.230) |                          |    |                 |                      |
|                                   | <i>NFE2L2</i>      | 13035806   | 56                         | 54 | 12            | 16 | 0.448           | 0.723 (0.313–1.670) | 2                        | 0  | 0.999           | -                    |
|                                   | <i>(NRF2)</i>      | 2706110    | 45                         | 39 | 22            | 29 | 0.241           | 0.657 (0.326–1.325) | 3                        | 2  | 0.780           | 1.300 (0.206–8.184)  |
|                                   | <i>KEAP1</i>       | 1048290    | 24                         | 27 | 39            | 36 | 0.586           | 1.219 (0.598–2.485) | 7                        | 7  | 0.845           | 1.125 (0.345–3.673)  |

*p*-values are related to controls. Statistically significant results are in bold.

**Table S4.** Distribution between studied SNPs in different genes in pharyngeal tumours (Ca) and controls (Co).

| FUNCTION                          | GENE               | RS         | Homozygotes Common Alleles |    | Heterozygotes |    |                 |                     | Homozygotes Rarer Allele |    |                 |                     |
|-----------------------------------|--------------------|------------|----------------------------|----|---------------|----|-----------------|---------------------|--------------------------|----|-----------------|---------------------|
|                                   |                    |            | Ca                         | Co | Ca            | Co | <i>p</i> -value | OR (95% CI)         | Ca                       | Co | <i>p</i> -Value | OR (95% CI)         |
| Oncogenes/tumour suppressor genes | <i>TP53</i>        | 1042522    | 53                         | 47 | 44            | 33 | 0.583           | 1.182 (0.650–2.151) | 3                        | 20 | <b>0.002</b>    | 0.133 (0.037–0.476) |
|                                   | <i>MDM2</i>        | 2279744    | 49                         | 49 | 37            | 42 | 0.675           | 0.881 (0.487–1.595) | 14                       | 9  | 0.350           | 1.556 (0.616–3.928) |
|                                   | <i>KRAS-LC6</i>    | rs61764370 | 68                         | 69 | 30            | 27 | 0.704           | 1.127 (0.607–2.093) | 2                        | 4  | 0.442           | 0.507 (0.090–2.862) |
|                                   | <i>EGFR</i>        | 2227983    | 58                         | 54 | 36            | 37 | 0.743           | 0.906 (0.502–1.634) | 6                        | 9  | 0.394           | 0.621 (0.207–1.860) |
| Base excision repair (BER)        | <i>XRCC1</i>       | 25487      | 40                         | 44 | 47            | 44 | 0.594           | 1.175 (0.649–2.127) | 13                       | 12 | 0.701           | 1.192 (0.487–2.913) |
|                                   |                    | 1799782    | 90                         | 87 | 10            | 12 | 0.634           | 0.806 (0.3311.961)  | 0                        | 1  | 1.000           | 0.000 (0.000–)      |
| Nucleotide excision repair (NER)  | <i>APEX</i>        | 1130409    | 29                         | 35 | 45            | 39 | 0.320           | 1.393 (0.725–2.675) | 26                       | 26 | 0.615           | 1.207 (0.580–2.513) |
|                                   | <i>ERCC2 (XPD)</i> | 13181      | 48                         | 49 | 36            | 40 | 0.782           | 0.919 (0.504–1.676) | 16                       | 11 | 0.370           | 1.485 (0.625–3.526) |
|                                   | <i>ERCC1</i>       | 11615      | 39                         | 36 | 48            | 51 | 0.646           | 0.869 (0.477–1.584) | 13                       | 13 | 0.860           | 0.923 (0.378–2.253) |
|                                   | <i>XPC</i>         | 2228000    | 48                         | 54 | 46            | 38 | 0.296           | 1.362 (0.763–2.431) | 6                        | 8  | 0.768           | 0.844 (0.273–2.606) |
| Double-strand break repair genes  | <i>XRCC3</i>       | 861539     | 36                         | 35 | 43            | 49 | 0.616           | 0.853 (0.459–1.586) | 21                       | 16 | 0.550           | 1.276 (0.574–2.839) |
|                                   |                    | 1799794    | 56                         | 59 | 36            | 38 | 0.722           | 1.112 (0.620–1.995) | 5                        | 6  | 0.711           | 1.264 (0.365–4.377) |
|                                   |                    | 2267437    | 39                         | 33 | 47            | 49 | 0.504           | 0.812 (0.440–1.497) | 14                       | 18 | 0.328           | 0.658 (0.285–1.522) |
| Inflammatory genes                | <i>IL1B</i>        | 16944      | 47                         | 52 | 43            | 39 | 0.506           | 1.220 (0.679–2.192) | 10                       | 9  | 0.681           | 1.229 (0.460–3.286) |
|                                   | <i>IL2</i>         | 2069762    | 46                         | 52 | 41            | 37 | 0.459           | 1.253 (0.690–2.273) | 13                       | 11 | 0.526           | 1.336 (0.546–3.272) |
|                                   | <i>IL6</i>         | 1800795    | 46                         | 48 | 45            | 35 | 0.336           | 1.342 (0.737–2.442) | 9                        | 13 | 0.498           | 0.722 (0.282–1.852) |
|                                   | <i>IL10</i>        | 1800872    | 60                         | 57 | 37            | 38 | 0.792           | 0.925 (0.518–1.652) | 3                        | 5  | 0.456           | 0.570 (0.130–2.495) |
|                                   | <i>TNFA</i>        | 361525     | 83                         | 83 | 17            | 15 | 0.746           | 1.133 (0.531–2.419) | 0                        | 2  | 0.999           | 0.000 (0.000–)      |
| Apoptotic genes                   | <i>NOD2</i>        | 2066844    | 82                         | 86 | 17            | 14 | 0.538           | 1.274 (0.590–2.749) | 1                        | 0  | 1.000           | 1694278518 (000–)   |
|                                   |                    | 2066845    | 96                         | 95 | 4             | 5  | 0.734           | 0.792 (0.206–3.039) | 0                        | 0  | -               | -                   |
|                                   | <i>BAX</i>         | 4645878    | 83                         | 74 | 15            | 23 | 0.141           | 0.581 (0.282–1.197) | 2                        | 3  | 0.575           | 0.594 (0.097–3.655) |
|                                   | <i>BCL2</i>        | 2279115    | 30                         | 33 | 46            | 42 | 0.573           | 1.205 (0.630–2.302) | 24                       | 25 | 0.886           | 1.056 (0.500–2.229) |
| Carcinogen metabolism genes       | <i>CYP3A5</i>      | rs776746   | 89                         | 89 | 10            | 10 | 1.000           | 1.000 (0.397–2.520) | 0                        | 0  | -               | -                   |
|                                   | <i>GSTP1</i>       | 1695       | 49                         | 40 | 41            | 46 | 0.293           | 0.728 (0.402–1.317) | 7                        | 12 | 0.155           | 0.476 (0.171–1.322) |
|                                   | <i>GSTT1</i>       | N/A        | 84                         | 86 | 16            | 14 | 0.692           | 0.855 (0.393–1.860) |                          |    |                 |                     |
|                                   | <i>GSTM1</i>       | N/A        | 46                         | 49 | 54            | 51 | 0.671           | 0.887 (0.509–1.545) |                          |    |                 |                     |
|                                   | <i>NFE2L2</i>      | 13035806   | 78                         | 75 | 18            | 25 | 0.292           | 0.692 (0.349–1.372) | 3                        | 0  | 0.999           | -                   |
|                                   | <i>(NRF2)</i>      | 2706110    | 68                         | 54 | 25            | 41 | <b>0.020</b>    | 0.484 (2.262–0.893) | 7                        | 5  | 0.863           | 1.112 (0.334–3.698) |
|                                   | <i>KEAP1</i>       | 1048290    | 42                         | 44 | 49            | 46 | 0.713           | 1.116 (0.623–2.000) | 9                        | 10 | 0.908           | 0.943 (0.349–2.550) |

*p*-values are related to controls. Statistically significant results are in bold.
